# Supplementary material for: Translating Niphargus barcodes from Switzerland into taxonomy with a description of two new species (Amphipoda, Niphargidae)
Source: Zookeys. 2018 May 28;(760):113–41. doi: 10.3897/zookeys.760.24978 (PMC5986823; doi:10.3897/zookeys.760.24978)
Supplement: Supplementary material 1 — Table S1. List of samples used in phylogenetic analyses along with GenBank Accessions [file zookeys-760-113-s001.xlsx]

## Sheet: Table S1
Table S1. List of samples used in phylogenetic analyses along with GenBank Accessions.
Taxon	Voucher id	Locality	Country	28S	H3	COI	References
Niphargus virei C	NA003	Well Dorpstraat 7, Reijmerstok, Limburg	Nederlands	EF617237	JQ815467	KR905771	Trontelj et al. 2009, Fišer et al. 2013, Esmaeili-Rineh et al. 2015
Niphargus longicaudatus E	NA006	Retec, spring in a forest, Lubenice, Cres	Croatia	EF617240	KJ566705	KR905772	Trontelj et al. 2009, Altermatt et al. 2014, Esmaeili-Rineh et al. 2015
Niphargus longicaudatus A	NA007	Spring at the road, between Monte Faito and Vico Equense, Napoli	Italy	EF617241	JQ815469	KX379137	Trontelj et al. 2009, Fišer et al. 2013, Fišer et al. 2017
Niphargus longicaudatus B	NA008	ditch 3 km V od Santa Marija la Fossa, Caserta, Napoli	Italy	EF617242	KX379056	/	Trontelj et al. 2009, Fišer et al. 2017
Niphargus longicaudatus C	NA009	Spring Sorgente di Laura, Gargano	Italy	EF617243	JQ815470	KX379136	Trontelj et al. 2009, Fišer et al. 2013, Fišer et al. 2017
Niphargus pasquinii	NA010	Spring Sorgenti di S. Vittorino, Rieti, Lazio	Italy	EF617244	JQ815471	KR905773	Trontelj et al. 2009, Fišer et al. 2013, Esmaeili-Rineh et al. 2015
Niphargus dobati	NA013	Phreatic water of Rak river, Rakov Škocjan, Rakek	Slovenia	EF617247	JQ815499	KR905774	Trontelj et al. 2009, Trontelj et al. 2012 , Esmaeili-Rineh et al. 2015
Niphargus carniolicus	NA017	Jama pod gradom Luknja (cave), Prečna, Novo mesto	Slovenia	EF617252	JQ815501	KR905776	Trontelj et al. 2009, Trontelj et al. 2012 , Esmaeili-Rineh et al. 2015
Niphargus fongi	NA018	Dolga jama pri Koblarjih (cave), Kočevje	Slovenia	EF617253	JQ815472	/	Trontelj et al. 2009, Fišer et al. 2013
Niphargus alpinus	NA019	Ramsauer Tal, NorateilD515/3-1	Germany	EF617254	/	/	Trontelj et al. 2009
Niphargus labacensis	NA022	Phreatic water of Sava river, Sneberje, Ljubljana	Slovenia	EF617257	JQ815474	KR905777	Trontelj et al. 2009, Fišer et al. 2013, Esmaeili-Rineh et al. 2015
Niphargus pectinicauda	NA023	Hyporheic water of Sava river, Tomačevo, Ljubljana	Slovenia	EF617258	JQ815475	KR905778	Trontelj et al. 2009, Fišer et al. 2013, Esmaeili-Rineh et al. 2015
Niphargus aberrans	NA025	Phreatic water of Sava river, Sneberje, Ljubljana	Slovenia	EF617260	KX379048	/	Trontelj et al. 2009, Fišer et al. 2017
Niphargus scopicauda	NA027	Kobansko, Habidova graba, Kozjak	Slovenia	EF617262	KJ566706	/	Trontelj et al. 2009, Altermatt et al. 2014
Niphargus tatrensis	NA028	Lodowe zrodlo, Koscieliska valley, Zakopane	Poland	EF617263	/	/	Trontelj et al. 2009
Niphargus aquilex	NA029	Marden, West Sussex	Great Britain	EF617264	KP300936	/	Trontelj et al. 2009, Fišer et al. 2015
Niphargus schellenbergi	NA032	Well of Heyd, Durbuy	Belgium	EF617267	JQ815478	KR905780	Trontelj et al. 2009, Fišer et al. 2013, Esmaeili-Rineh et al. 2015
Niphargus sp.n. Djevojacka pecina	NA033	Djevojačka pećina, Kladanj	Bosnia & Herzegovina	EF617268	KJ566707	KX379134	Trontelj et al. 2009, Altermatt et al. 2014, Fišer et al. 2017
Niphargus dolenianensis	NA034	Stream Torre, N of Ruda	Italy	EF617269	KJ566708	KX379133	Trontelj et al. 2009, Altermatt et al. 2014, Fišer et al. 2017
Niphargus boskovici	NA036	Beljušica pećina, Zavala, Popovo polje	Bosnia & Herzegovina	EF617271	JQ815502	KR905781	Trontelj et al. 2009, Trontelj et al. 2012 , Esmaeili-Rineh et al. 2015
Niphargus hvarensis	NA038	Spring near monument in Trsteno, Dubrovnik	Croatia	EF617273	JQ815479	KR905782	Trontelj et al. 2009, Fišer et al. 2013, Esmaeili-Rineh et al. 2015
Niphargus krameri	NA039	Brook Brestovac, Pazin	Croatia	EF617274	JQ815480	KX379132	Trontelj et al. 2009, Fišer et al. 2013, Fišer et al. 2017
Niphargus rejici	NA048	Spring at lake Podpeško jezero, Ig, Ljubljana	Slovenia	EF617283	JQ815481	KR905785	Trontelj et al. 2009, Fišer et al. 2013, Esmaeili-Rineh et al. 2015
Niphargus stenopus	NA049	Jama pod gradom Luknja (cave), Prečna, Novo mesto	Slovenia	EF617284	JQ815506	/	Trontelj et al. 2009, Trontelj et al. 2012
Niphargus arbiter	NA052	Tounjčica špilja, Tounj, Ogulin	Croatia	EF617287	JQ815482	KR905787	Trontelj et al. 2009, Fišer et al. 2013, Esmaeili-Rineh et al. 2015
Niphargus salonitanus	NA053	Spring at church Stomarija, Kaštel Stari, Split	Croatia	KR905868	JQ815483	KR905788	Esmaeili-Rineh et al. 2015, Fišer et al. 2013, Esmaeili-Rineh et al. 2015
Niphargus dalmatinus	NA060	Spring near Vrana, Vrana, Zadar	Croatia	EF617296	JQ815484	KR905790	Trontelj et al. 2009, Fišer et al. 2013, Esmaeili-Rineh et al. 2015
Niphargus elegans	NA061	Ditch in San Pancrazio, Verona	Italy	EF617297	JQ815485	KR905791	Trontelj et al. 2009, Fišer et al. 2013, Esmaeili-Rineh et al. 2015
Niphargus tridentinus	NA063	Bus Pursi cave, Lumezzane, Brescia	Italy	EF617299	JQ815487	KR905793	Trontelj et al. 2009, Fišer et al. 2013, Esmaeili-Rineh et al. 2015
Niphargus lessiniensis	NA064	Grotta dell’ Aqua (cave), Ponte de Veja, Monti Lessini, Verona	Italy	EF617300	JQ815488	KR905794	Trontelj et al. 2009, Fišer et al. 2013, Esmaeili-Rineh et al. 2015
Niphargus tonywhitteni sp. nov.	NA065	GWM parkhaus Clychystr., 218; 23/763-1; GWM	Germany	EF617301	KJ566731	KX379131	Trontelj et al. 2009, Altermatt et al. 2014, Fišer et al. 2017
Niphargus puteanus	NA066	Spring S south of Gaesthouse Zur Walba, along the road Pentling - Matting, Regensburg	Germany	EF617302	KJ566709	KR905795	Trontelj et al. 2009, Altermatt et al. 2014, Esmaeili-Rineh et al. 2015
Niphargus auerbachi	NA069	277 8/469-9, GWM 8, Sachweickart, Messkirchen	Germany	EU693292	KJ566711	KX379130	Fišer et al. 2008, Altermatt et al. 2014, Fišer et al. 2017
Niphargus balcanicus	NA070	Vjetrenica cave, Zavala	Bosnia & Herzegovina	EF617280	JQ815507	KX379129	Trontelj et al. 2009, Trontelj et al. 2012 , Fišer et al. 2017
Niphargus brachytelson	NA071	Lukova jama (cave), Zdihovo, Kočevje	Slovenia	EU693293	JQ815489	KR905797	Fišer et al. 2008, Fišer et al. 2013, Esmaeili-Rineh et al. 2015
Niphargus costozzae	NA074	Covolo della Guera, Lumignano, Vicenza	Italy	EU693294	KJ566713	KX379128	Fišer et al. 2008, Altermatt et al. 2014, Fišer et al. 2017
Niphargus delamarei	NA075	Grotte des Fees, Leucate, Perpignan	Croatia	EU693295	KJ566714	/	Fišer et al. 2008, Altermatt et al. 2014
Niphargus croaticus	NA076	Suvaja pećina (cave), Lušci polje, Sanski most	Bosnia & Herzegovina	EU693297	JQ815490	KT007331	Fišer et al. 2008, Trontelj et al. 2012
Niphargus factor	NA078	Vjetrenica, Zavala, Popovo polje	Bosnia & Herzegovina	EU693298	JQ815508	KR905798	Fišer et al. 2008, Trontelj et al. 2012 , Esmaeili-Rineh et al. 2015
Niphargus grandii	NA080	Stream Torre, N of Ruda	Italy	EU693300	KJ566715	KR905799	Fišer et al. 2008, Altermatt et al. 2014, Esmaeili-Rineh et al. 2015
Niphargus hrabei	NA083	Stream along the road W of Lupoglav, Zagreb	Croatia	EU693302	KJ566716	KR905801	Fišer et al. 2008, Altermatt et al. 2014, Esmaeili-Rineh et al. 2015
Niphargus illidzensis	NA084	Spring of river Bosna, Ilidža, Sarajevo	Bosnia & Herzegovina	EU693304	JQ815491	KR905802	Fišer et al. 2008, Fišer et al. 2013, Esmaeili-Rineh et al. 2015
Niphargus kenki	NA086	Izvir pod hišo Sodna vas 25, Sodna vas, Podčetrtek	Slovenia	KR905869	/	KR905804	Esmaeili-Rineh et al. 2015, Esmaeili-Rineh et al. 2015
Niphargus kochianus	NA090	St. Albans, Hertfordshire	United Kingdom	EU693308	JQ815492	/	Fišer et al. 2008, Fišer et al. 2013
Niphargus longiflagellum	NA093	Podpeška jama (cave), Dobrepolje,	Slovenia	EU693311	JQ815520	KR905805	Fišer et al. 2008, Trontelj et al. 2012 , Esmaeili-Rineh et al. 2015
Niphargus novomestanus	NA096	Spring Tominčev studenec, Dvor, Žužemberk	Slovenia	EU693314	JQ815509	KR858496	Fišer et al. 2008, Trontelj et al. 2012 , Fišer Ž et al. 2015
Niphargus orcinus	NA099	Križna jama (cave), Lož	Slovenia	EU693315	JQ815510	KR905808	Fišer et al. 2008, Trontelj et al. 2012 , Esmaeili-Rineh et al. 2015
Niphargus pachytelson	NA100	Podpeška jama (cave), Dobrepolje	Slovenia	EU693316	JQ815511	KR905809	Fišer et al. 2008, Trontelj et al. 2012 , Esmaeili-Rineh et al. 2015
Niphargus podpecanus	NA101	Podpeška jama (cave), Dobrepolje	Slovenia	EU693317	JQ815512	KR905810	Fišer et al. 2008, Trontelj et al. 2012 , Esmaeili-Rineh et al. 2015
Niphargus parapupetta	NA102	Hyporheic water of Sava river, Tomačevo, Ljubljana	Slovenia	EU693318	KJ566717	/	Fišer et al. 2008, Altermatt et al. 2014
Niphargus rhenorhodanensis DE	NA104	Grotte Cormoran,Torcieu, Albarine basin, Lyon	France	EU693319	KJ566719	KR905811	Fišer et al. 2008, Altermatt et al. 2014, Esmaeili-Rineh et al. 2015
Niphargus sanctinaumi	NA105	spring Sv. Naum, Ohrid	Macedonia	EU693320	KP133144	KR905812	Fišer et al. 2008, Ntakis et al. 2015, Esmaeili-Rineh et al. 2015
Niphargus spinulifemur	NA107	Brook NE from village Hrastovlje	Slovenia	EU693323	JQ815494	KR858500	Fišer et al. 2008, Fišer et al. 2013, Fišer Ž et al. 2015
Niphargus spoeckeri	NA108	Pivka jama (cave), Postojna, Slovenia	Slovenia	EU693324	JQ815513	KR905814	Fišer et al. 2008, Trontelj et al. 2012 , Esmaeili-Rineh et al. 2015
Niphargus subtypicus	NA112	Jama pod gradom Luknja (cave), Prečna, Novo mesto	Slovenia	EU693326	JQ815514	KT007433	Fišer et al. 2008, Trontelj et al. 2012
Niphargus timavi	NA114	Grotte di Trebiciano (cave), Trieste	Italy	EU693327	JQ815495	KR858497	Fišer et al. 2008, Fišer et al. 2013, Fišer Ž et al. 2015
Niphargus vjetrenicensis	NA116	Vjetrenica cave, Zavala	Bosnia & Herzegovina	EU693329	JQ815521	/	Fišer et al. 2008, Trontelj et al. 2012
Niphargus styigius	NA123	Jama pod Predjamskim gradom (cave), Postojna	Slovenia	EU693325	JQ815494	KR858498	Fišer et al. 2008, Trontelj et al. 2012 , Fišer Ž et al. 2015
Niphargus dimorphopus	NA125	Well Dorpstraat 7, Reijmerstok, Limburg, Gulpen	Netherlands	EU693296	JQ815496	/	Fišer et al. 2008, Fišer et al. 2013
Niphargus laisi	NA135	Lorrach, Weil am Rhein, Schopfheim	Germany	KX379002	KX379058	KX379076	Fišer et al. 2017
Niphargus dimorphopus	NA136	Prov. Limburg, Gulpen, well at Dorpstraat 7, Reijmerstok	Netherlands	KJ566702	JQ815496	KX379138	Altermatt et al. 2014, Fišer et al. 2013, Fišer et al. 2017
Niphargus cvijici	NA147	Springs, Popovo polje, Ravno	Bosnia & Herzegovina	JQ815554	JQ815516	KR905819	Trontelj et al. 2012, Esmaeili-Rineh et al. 2015
Niphargus dancaui	NA152	Well, Valeni, Ploesti	Romania	KJ566693	KJ566720	KR905821	Altermatt et al. 2014, Esmaeili-Rineh et al. 2015
Niphargus multipennatus	NA169	Hyporheic water of Sava river, Tomačevo, Ljubljana	Slovenia	KJ566700	KJ566721	KR905825	Altermatt et al. 2014, Esmaeili-Rineh et al. 2015
Niphargus sphagnicolus	NA209	Prevojske gmajne, Prevoje pri Šentvidu, Domžale	Slovenia	KJ566694	/	KX379127	Altermatt et al. 2014, Fišer et al. 2017
Niphargus aggtelekiensis	NA501	Gesause National Park, spring sample ET2B	Austria	KJ566697	KJ566722	KX379126	Altermatt et al. 2014 Fišer et al. 2017
Niphargus ambulator	NA504	Buco del Piombino (Como)	Italy	KJ566699	KJ566723	KX379125	Altermatt et al. 2014 Fišer et al. 2017
Niphargus tamaninii	NA522	Spring near Lago di Pietrarossa/Laško jezero, Monfalcone	Italy	KJ566701	KX379059	KX379124	Altermatt et al. 2014 Fišer et al. 2017
Niphargus caspary	NA525	Freising, Munchen	Germany	KX379003	KX379060	KX379123	Fišer et al. 2017
Niphargus fontanus	NA526	Water cathchment Gallery of Cruper	Belgium	KJ566686	KJ566724	KX379122	Altermatt et al. 2014 Fišer et al. 2017
Niphargus khayyami	NA744	Ghouri Ghaleh, cave, Ravansar-Paveh, Kermanshah	Iran	JX535353	/	/	Hekmatara et al. 2013
Niphargus koukourasi	NA894	Louros river, Vouliasta, Ioannina, Hellas	Greece	KP133159	KP133143	/	Ntakis et al. 2015
Niphargus aitolosi	NA895	Lake Lysimachia, Padanassa, Agrinio, Hellas	Greece	KP133160	KP133138	KP164475	Ntakis et al. 2015
Niphargus karkabounasi	NA899	Agioi Theodoroi, Korinthos, Peloponnese	Greece	KP133156	KP133136	KP164477	Ntakis et al. 2015
Niphargus virei B	NB402	Source de la Noiraigue, Neuchâtel	Switzerland	KJ566680	KJ566727	/	Altermatt et al. 2014
Niphargus rhenorhodanensis FG	NB436	Allaine, amont Touillière, Jura	Switzerland	KJ566692	KJ566738	/	Altermatt et al. 2014
Niphargus rhenorhodanensis ABC	NB437	Vendline, Vendlincourt source, Jura	Switzerland	KJ566681	KJ566741	KX379117	Altermatt et al. 2014, Fišer et al. 2017
Niphargus rhenorhodanensis H	NB439	Source Bellefontaine, Jura	Switzerland	KJ566685	KJ566733	KX379116	Altermatt et al. 2014, Fišer et al. 2017
Niphargus thienemanni	NB443	Ruosalper Bach, Unterschächen, Uri	Switzerland	KJ566688	KJ566729	KX379114	Altermatt et al. 2014, Fišer et al. 2017
Microniphargus leruthi	NC019	Polldubh, Galway, Clare	Ireland	KX379004	KX379049	/	Fišer et al. 2017
Niphargus brixianus	NC022	Grotta sotto la Cornabusa, Ca Canzo Valpiana, Valle Imagna	Italy	KX379005	KX379050	KX379113	Fišer et al. 2017
Niphargus poianoi	NC024	Poiano, mineral springs in river Secchia, Emilia-Romagna	Italy	KX379006	KX379061	KX379112	Fišer et al. 2017
Niphargus montanarius	NC025	Frassasi cave system, Genga, Ancona	Italy	KX379007	KX379051	KX379111	Fišer et al. 2017
Niphargus ictus	NC026	Frassasi cave system, Genga, Ancona	Italy	KX379008	KX379062	KX379110	Fišer et al. 2017
Niphargus frasassianus	NC027	Frassasi cave system, Genga, Ancona	Italy	KX379009	KX379063	KX379077	Fišer et al. 2017
Niphargus romuleus	NC033	Grotta dei cinque laghi, Monte Nerone, Piobbico	Italy	KX379010	KX379052	KX379078	Fišer et al. 2017
Niphargus rhenorhodanensis FG	NC046	Gouffre Creux dentier, Monible	Switzerland	/	KX379065	KX379107	Fišer et al. 2017
Niphargus luchoffmani sp. nov.	NC048	Sparenweid Finstersee, Menzingen	Switzerland	KX379014	/	KX379105	Fišer et al. 2017
Niphargus cf stygius*	NC050	Chli Maelchtalhoehle, Muotathal	Switzerland	KX379016	KX379070	KX379103	Fišer et al. 2017
Niphargus murimali	NC059	Hoelloch Senke, Muotathal	Switzerland	KX379022	KX379071	KX379097	Fišer et al. 2017
Niphargus styx	NC060	Hoelloch Senke, Muotathal	Switzerland	KX379023	KX379066	KX379096	Fišer et al. 2017
Niphargus muotae	NC061	Hoelloch Versickerung, Muotathal	Switzerland	KX379024	KX379067	KX379095	Fišer et al. 2017
Niphargus cf thiennemmani	NC107	Laggina, Zwischbergen	Switzerland	KX379031	KX379053	KX379074	Fišer et al. 2017
Niphargus luchoffmani sp. nov.	NC113	Jaegerquelle, Wolfenschiessen	Switzerland	KX379037	/	KX379073	Fišer et al. 2017
Niphargus luchoffmani sp. nov.	NC114	Marchbachquelle, Wolfenschiessen	Switzerland	KX379038	/	/	Fišer et al. 2017
Niphargus luchoffmani sp. nov.	NC116	Fangbachquelle, Wolfenschiessen	Switzerland	KX379040	/	KX379072	Fišer et al. 2017
Niphargus rhenorhodanensis FG	NC118	Grotte du Chemin de Fer, Boudry	Switzerland	KX379042	/	KX379084	Fišer et al. 2017
Niphargus tonywhitteni sp. nov.	NC121	Toess, Winterthur	Switzerland	KX379045	KX379054	KX379081	Fišer et al. 2017
Niphargus tonywhitteni sp. nov.	NC122	Achensee, Achenkirch	Austria	KX379046	KX379055	KX379080	Fišer et al. 2017
Niphargus puteanus	NC142	Blautopfhoehle, Blauberen, Baden-Wuertenberg	Germany	KX379047	KX379068	KX379079	Fišer et al. 2017
Niphargus puteanus	NC162	Klosterquelle, Wyhlen	Switzerland	MH172401	/	MH172424	this study
Niphargus luchoffmani sp. nov.	NC163	Innertkirchen, Engstlenseequelle	Switzerland	MH172403	/	MH172425	this study
Niphargus rhenorhodanensis	NC164	Biere, Source Toleure	Switzerland	/	/	MH172426	this study
Niphargus thienemmani	NC165	Glarus Sued, Linthal	Switzerland	MH172407	/	/	this study
Niphargus thienemmani	NC166	Engi, Mettlerus	Switzerland	MH172408	/	MH172427	this study
Niphargus thienemmani	NC167	Engi, Mettlerus	Switzerland	MH172409	/	/	this study
Niphargus thienemmani	NC168	Nesslau, Wiss Thur Herrenalp	Switzerland	MH172412	/	MH172428	this study
Niphargus thienemmani	NC169	Nesslau, Wiss Thur Herrenalp	Switzerland	MH172410	/	MH172429	this study
Niphargus thienemmani	NC170	Nesslau, Wiss Thur Herrenalp	Switzerland	MH172413	/	MH172430	this study
Niphargus cf thiennemmani	NC171	Sent, Uina	Switzerland	MH172406	/	MH172431	this study
Niphargus tonywhitteni sp. nov.	NC174	liegt in Heidenheim an der Brenz, Schwäbische Alb, Jura	Germany	MH172415	/	/	this study
Niphargus tonywhitteni sp. nov.	NC178	bei Biberach/Schwarzwald (Talfüllung im Kristallin)	Germany	MH172414	/	MH172432	this study
Niphargus luchoffmani sp. nov.	NC204	Beatenberg, Seefeldhoehle	Switzerland	MH172405	MH172418	MH172433	this study
Niphargus puteanus	NC205	Villigen, Stampfelbachhoehle	Switzerland	MH172402	MH172419	MH172434	this study
Niphargus thienemmani	NC206	Innertkirchen, Quelle Cholischwand,Gental	Switzerland	MH172411	MH172420	/	this study
Niphargus luchoffmani sp. nov.	NC207	Kandersteg, Quelle Oberbaergli 2, Oeschinensee	Switzerland	MH172404	MH172421	MH172435	this study
Niphargus rhenorhodanensis	NC219	Kandersteg, Oeschibach, Aare	Switzerland	MH172416	MH172422	MH172436	this study
Niphargus rhenorhodanensis	NC236	Sangerenboden, Quelle Chroneberg Hengstschlund, Aare	Switzerland	MH172417	MH172423	/	this study
Niphargus fontanus	/	Les Balmettes-St Rambert en Bugey-Ain	France	DQ119323	/	DQ064702	Lefebure et al. 2006
Niphargus plateaui	/	Pontchâteau	France	GU973466	/	GU973427	Flot et al. 2010
Niphargus rhenorhodanensis ABC	/	Adouin Spring	France	EF025819	/	/	Lefebure et al. 2007
Niphargus aquilex	/	Hessen, Lower Main Plain, Ravolzhausen	Germany	JF420870	/	/	Hartke et al. 2011
Niphargus forelli	/	source de la Fouige, Mercantour National Park	France	KC315616	/	KC315639	McInerney et al. 2014
Niphargus fontanus	/	39 Pz2-Balmettes	France	KC315609	/	KC315631	McInerney et al. 2014
Niphargus rhenorhodanensis DE	/	Vorey Mine	France	EF025801	/		Lefebure et al. 2007
Niphargus rhenorhodanensis FG	/	Pont des Aniers Cave	France	EF025821	/		Lefebure et al. 2007
Niphargus rhenorhodanensis H	/	Montreal la Cluse Alluvium	France	EF025832	/		Lefebure et al. 2007
Niphargus rhenorhodanensis I	/	Rhone-Alpes, Chalamont soil	France	EF025841	/		Lefebure et al. 2007
Niphargus rhenorhodanensis JK	/	Rhone-Alpes, Fardelay Spring	France	EF025809			Lefebure et al. 2007
Niphargus ladmiraulti	/	Chantenay, Nantes	France	GU973462	/	GU973424	Flot et al. 2010
* as Niphargus cf stygius 2 in Fišer et al. (2017)
